# Supplementary material for: Solid Lipid Nanoparticles Produced via a Coacervation Method as Promising Carriers for Controlled Release of Quercetin
Source: MDPI journal article supplement (doi:10.3390/molecules26092694), 2021-05-04
Supplement: s1 [file s1]

SUPPORTING INFORMATION

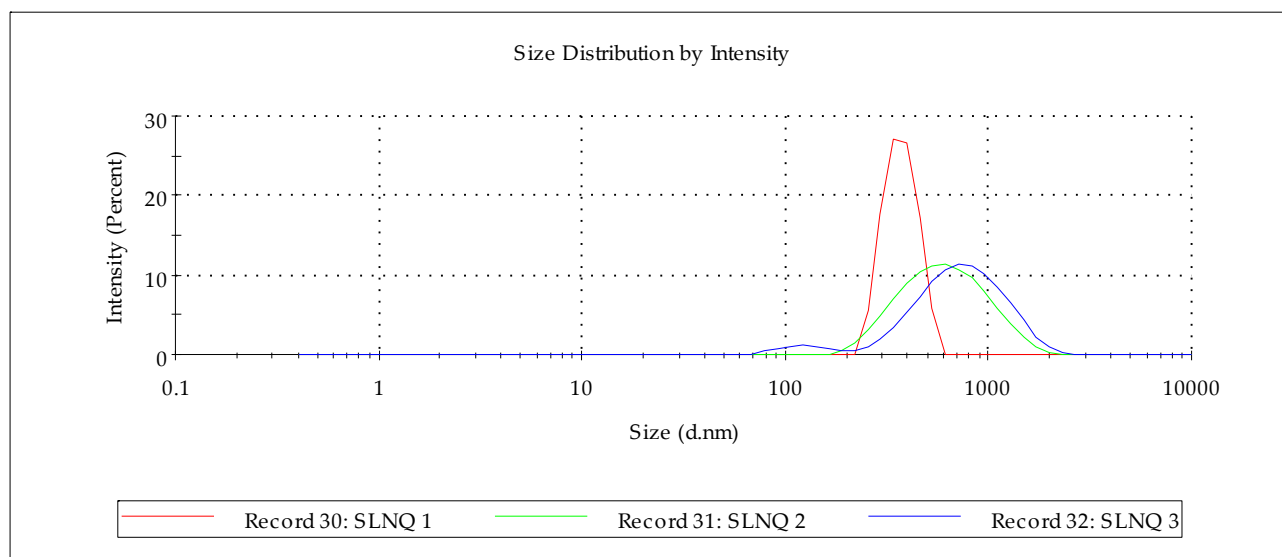

**Figure S1:** Size distribution of Quercetin-loaded Solid Lipid Nanoparticles

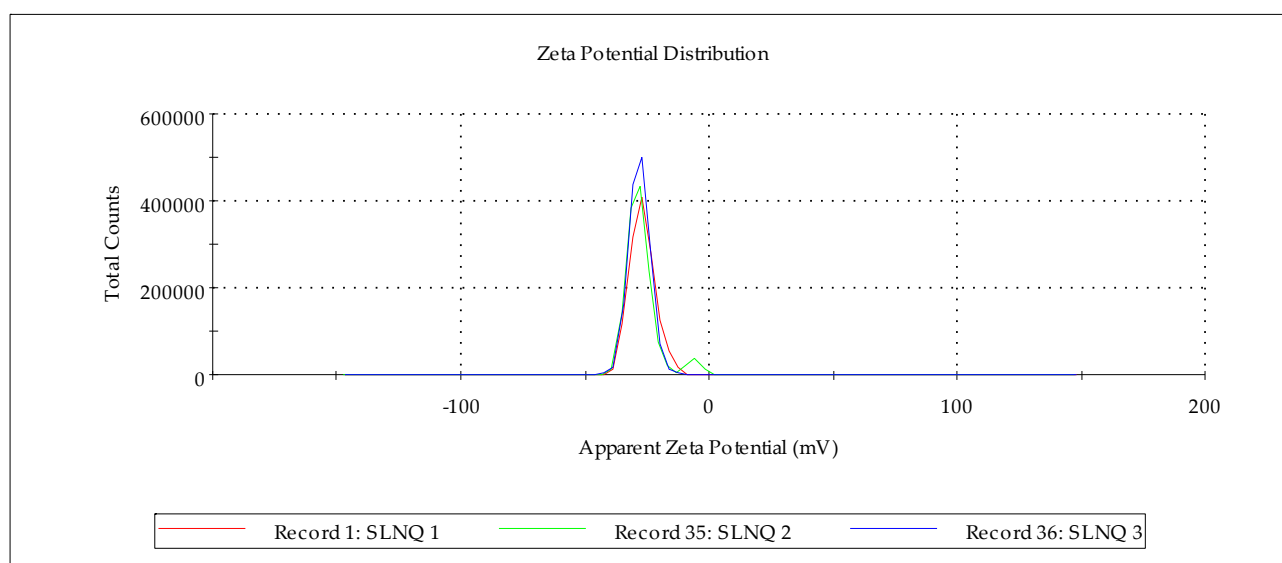

**Figure S2:** Zeta potential distributions for Quercetin-loaded Solid Lipid Nanoparticles

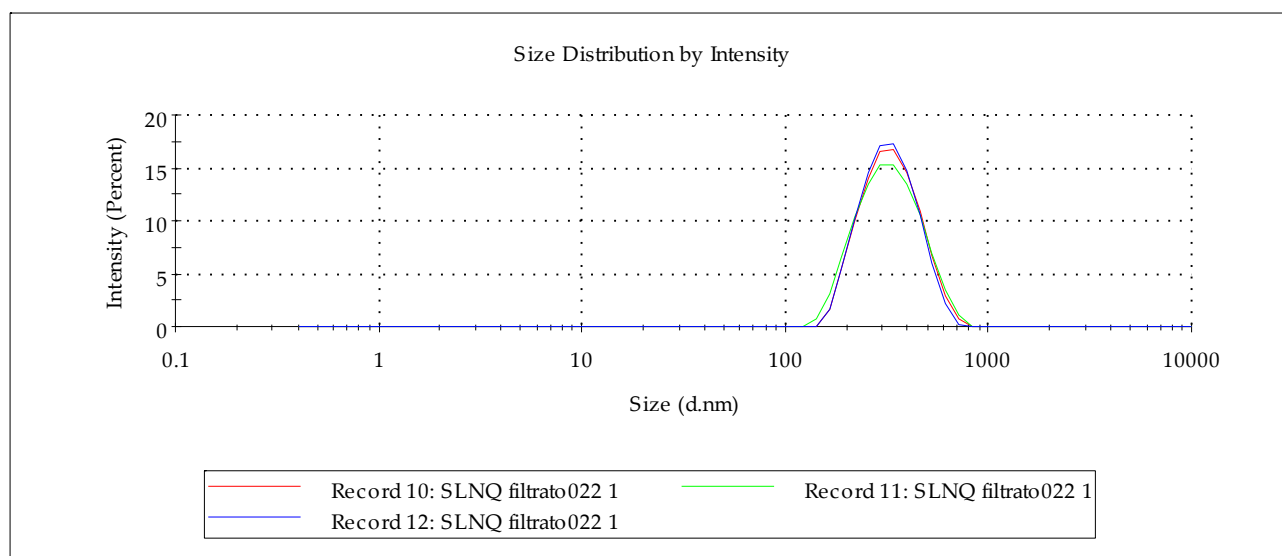

**Figure S3:** Size distributions for filtered Quercetin-loaded Solid Lipid Nanoparticles

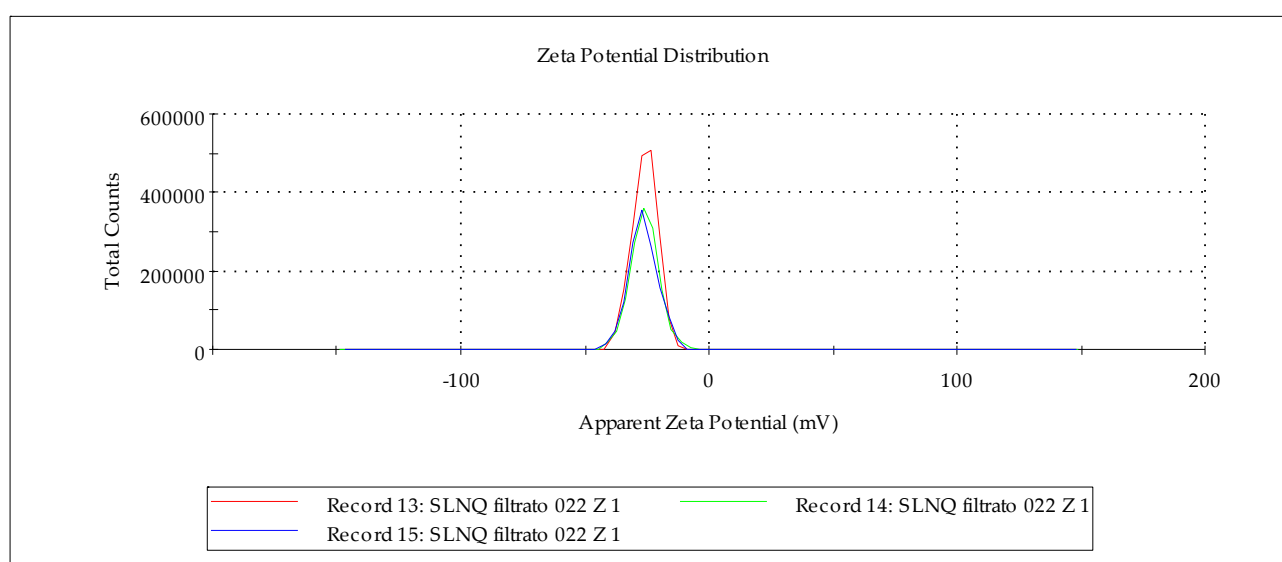

**Figure S4:** Zeta potential distributions for filtered Quercetin-loaded Solid Lipid Nanoparticles

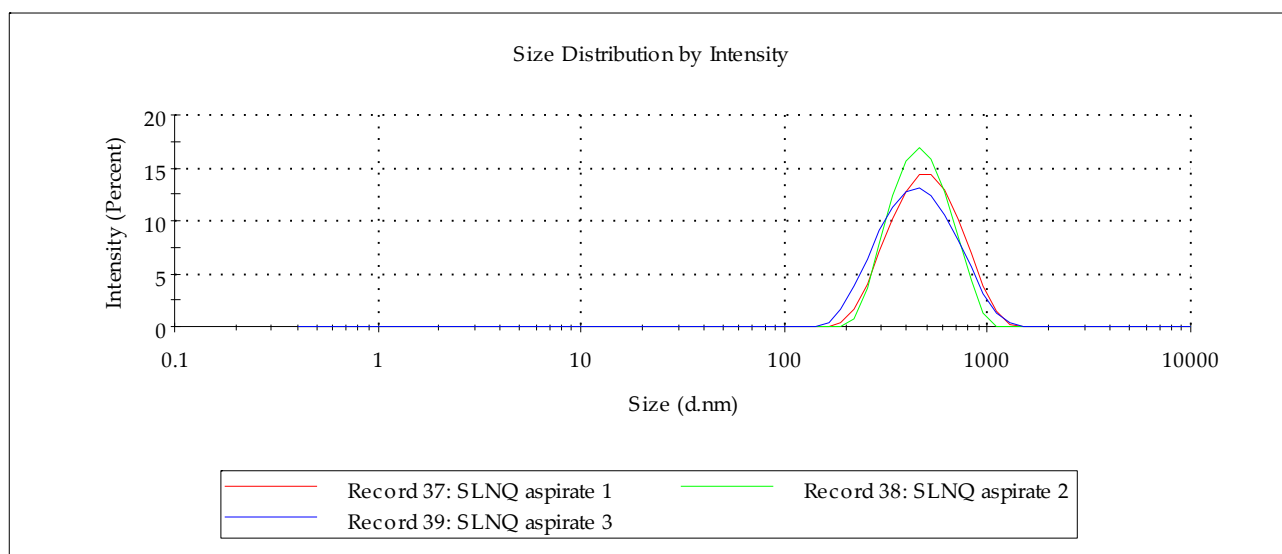

**Figure S5:** Size distribution for recovered from filter Quercetin-loaded Solid Lipid Nanoparticles

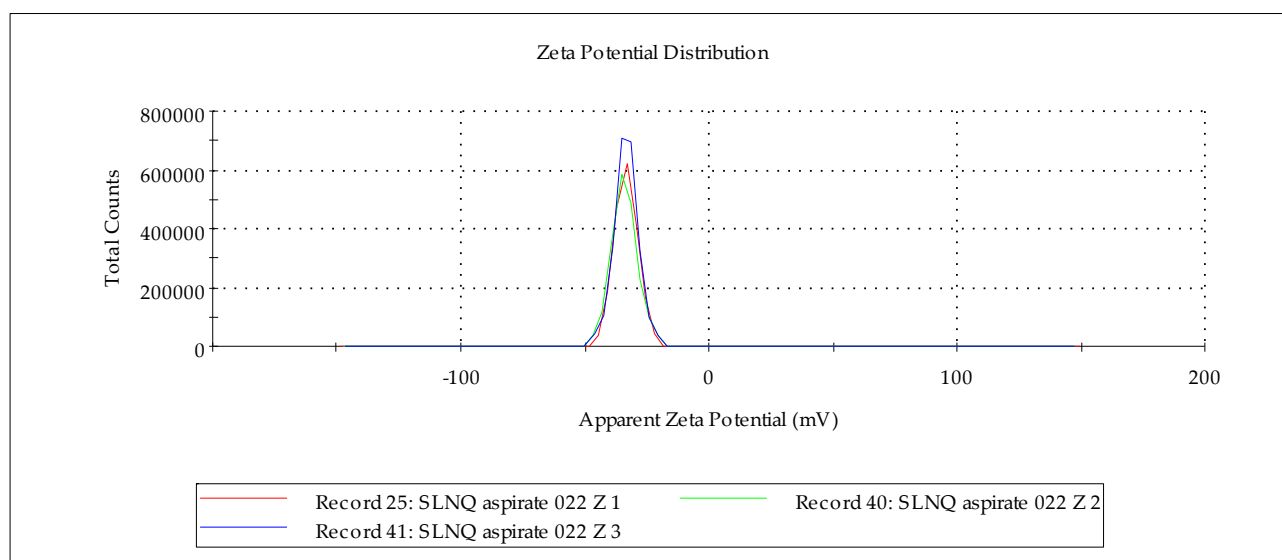

**Figure S6:** Zeta potential distributions for recovered from filter Quercetin-Loaded Solid Lipid Nanoparticles

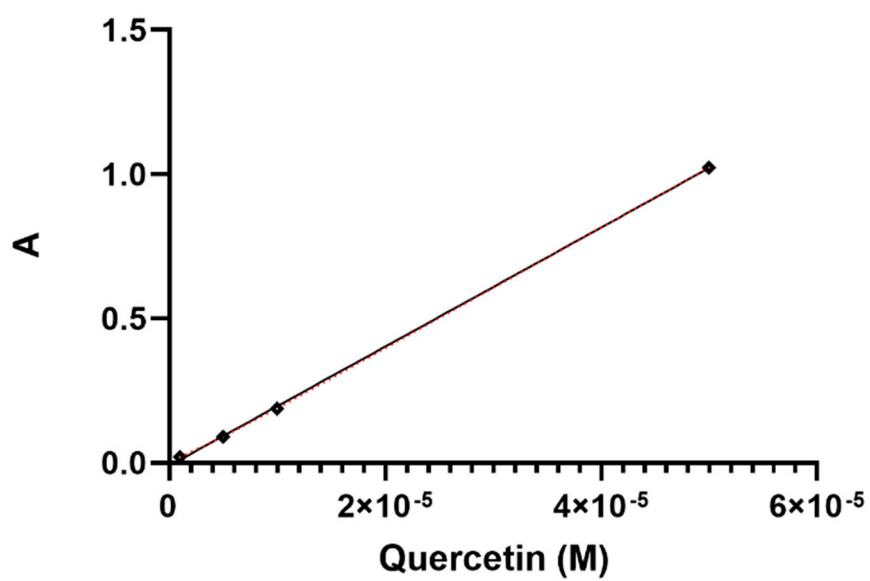

**Figure S7:** Calibration curve for Quercetin in EtOH.  $R^2=0.9997$ , eq.  $Y = 20630X - 0.009693$ .
